# Supplementary material for: A marine fungus efficiently degrades polyethylene
Source: bioRxiv or medRxiv preprint supplement (doi:10.1101/2021.11.19.469330), 2021-11-19
Supplement: Supplementary file [file media-1.pdf]

# Supplementary information

## A marine fungus efficiently degrades polyethylene

Rongrong Gao<sup>a,b,c,d</sup>, Rui Liu<sup>a,b,d</sup>, Chaomin Sun<sup>a,b,c,d\*</sup>

<sup>a</sup>CAS and Shandong Province Key Laboratory of Experimental Marine Biology & Center of Deep Sea Research, Institute of Oceanology, Chinese Academy of Sciences, Qingdao, China

<sup>b</sup>Laboratory for Marine Biology and Biotechnology, Pilot National Laboratory for Marine Science and Technology, Qingdao, China

<sup>c</sup>College of Earth Science, University of Chinese Academy of Sciences, Beijing, China

<sup>d</sup>Center of Ocean Mega-Science, Chinese Academy of Sciences, Qingdao, China

\* Corresponding author

Chaomin Sun    Tel.: +86 532 82898857; fax: +86 532 82898857.

E-mail address: [sunchaomin@qdio.ac.cn](mailto:sunchaomin@qdio.ac.cn)

## Supplementary Figures

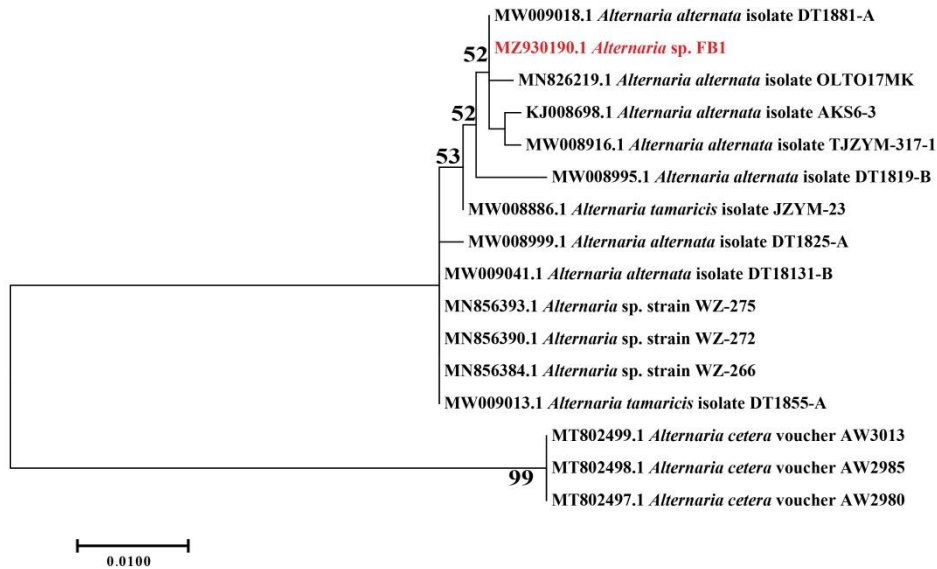

**Figure S1. ITS-based phylogenetic tree of *Alternaria* sp. FB1 with other related fungal strains obtained from the GenBank.** The accession number of each ITS is indicated after the species names. The phylogenetic tree was constructed by the neighbor-joining method and numbers above the branches are bootstrap values based on 1000 replicates. Bar, 0.01 substitutions per nucleotide position.

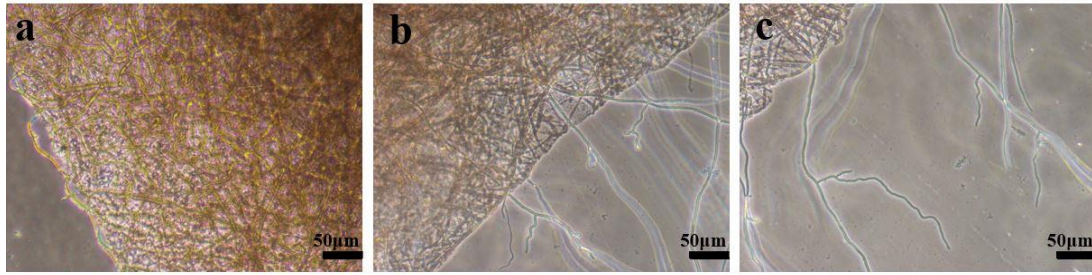

**Figure S2. The light microscopy observation of the mycelium morphology of strain FB1 in the seawater supplemented with or without the PE film for 120 days. a,** The mycelium morphology of strain FB1 incubated in the seawater for 120 days. **b, c,** The mycelium morphology of strain FB1 incubated in the seawater supplemented with the PE film for 120 days.

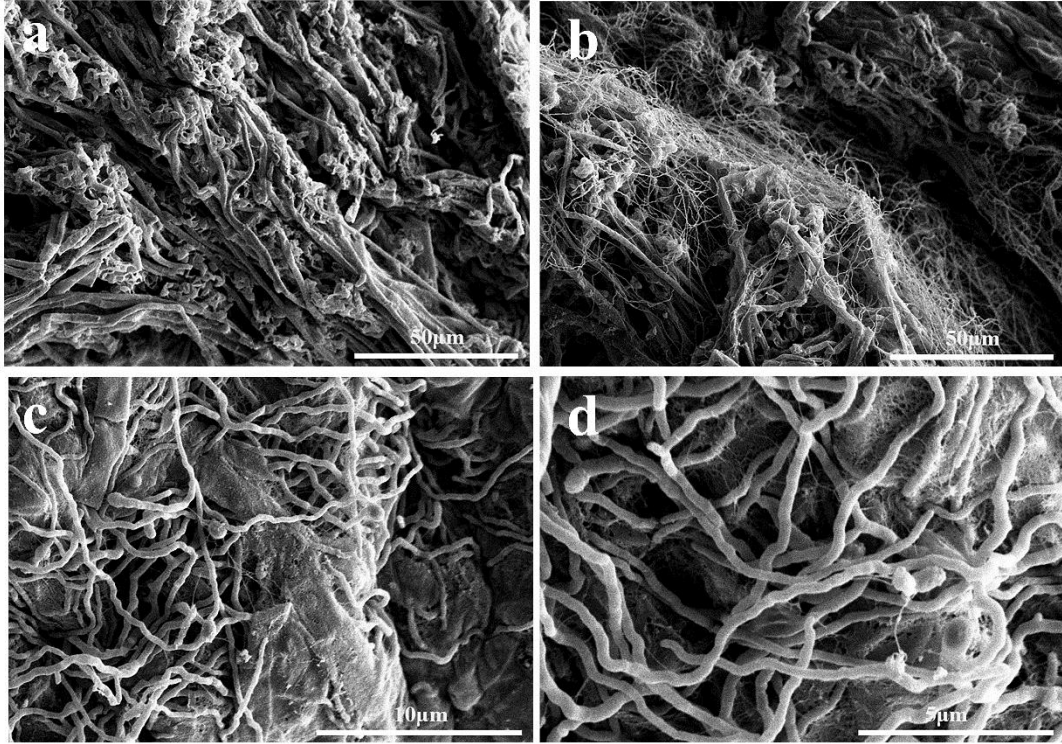

**Figure S3.** The SEM observation of the growth of strain FB1 in the seawater supplemented with or without the PE film for 120 days. **a**, The SEM observation of the mycelium morphology of strain FB1 in the seawater for 120 days. **b-d**, The SEM observation of mycelium morphology of strain FB1 in the seawater supplemented with the PE film for 120 days.

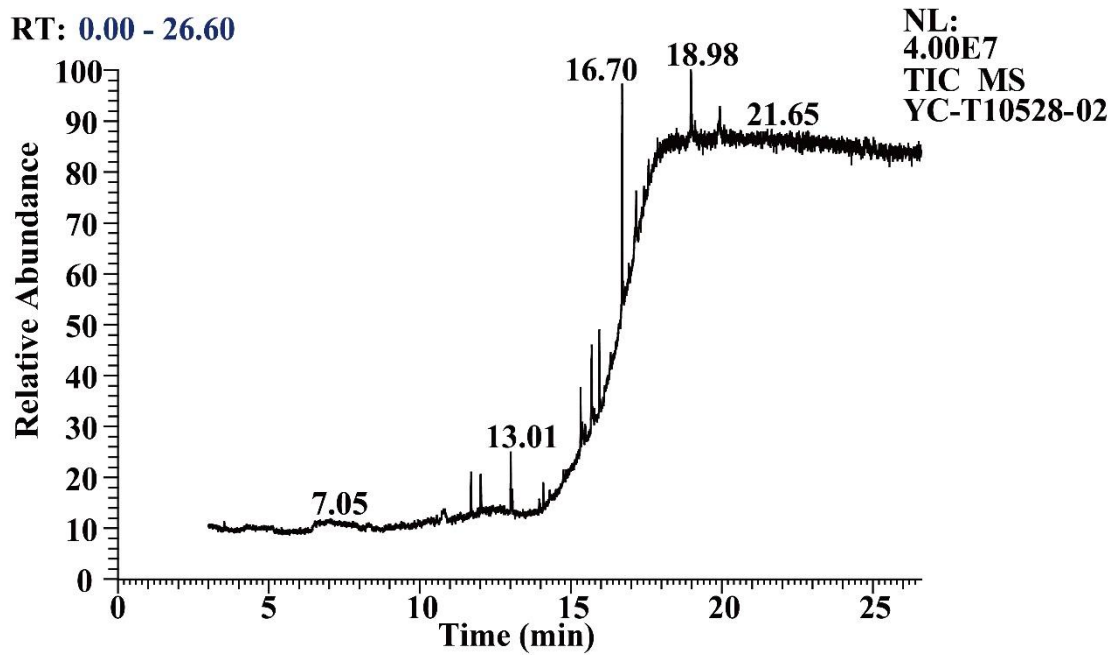

Figure S4. GC-MS chromatograms of the products extracted from PE biodegradation by *Alternaria* sp. FB1 for 60 days.

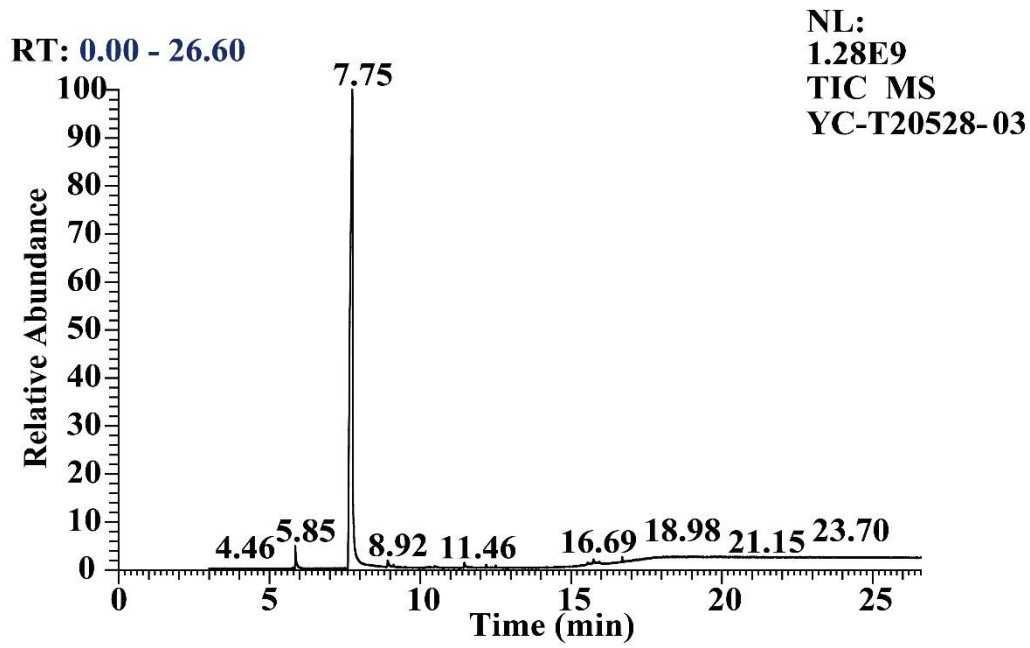

Figure S5. GC-MS chromatograms of the products extracted from PE biodegradation by *Alternaria* sp. FB1 for 120 days.

SI 888, RSI 932, replib, Entry# 20386, CAS# 101-83-7, Cyclohexanamine, N-cyclohexyl- Cyclohexanamine, N-cyclohexyl-  
Formula C12H23N, MW 181, CAS# 101-83-7, Entry# 20386  
Dicyclohexylamine

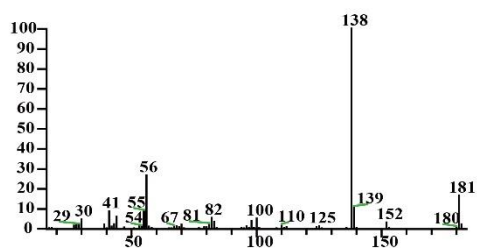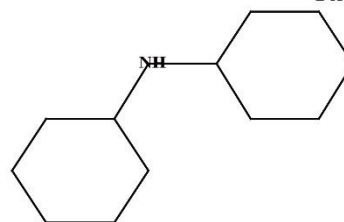

**Figure S6. Mass spectrometry analysis of a component at the retention time of 11.70 min identified as Cyclohexanamine, N-cyclohexyl-.**

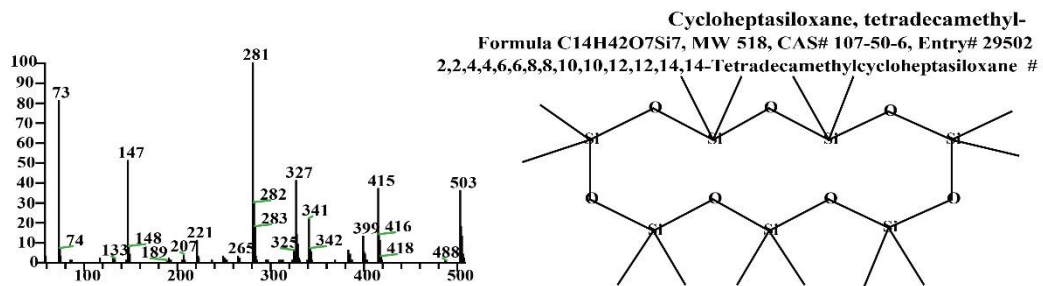

**Figure S7. Mass spectrometry analysis of a component at the retention time of 12.01 min identified as Cycloheptasiloxane, tetradecamethyl-.**



SI 901, RSI 935, replib, Entry# 14005, CAS# 126-73-8, Tributyl phosphate

Tributyl phosphate

Formula C<sub>12</sub>H<sub>27</sub>O<sub>4</sub>P, MW 266, CAS# 126-73-8, Entry# 14005  
TBP

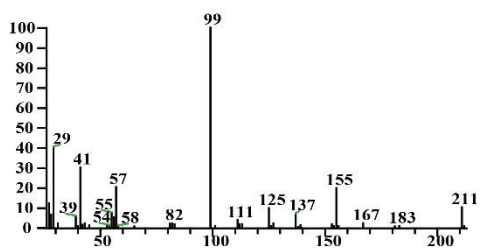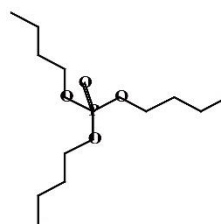

**Figure S8. Mass spectrometry analysis of a component at the retention time of 13.01 min identified as Tributyl phosphate.**

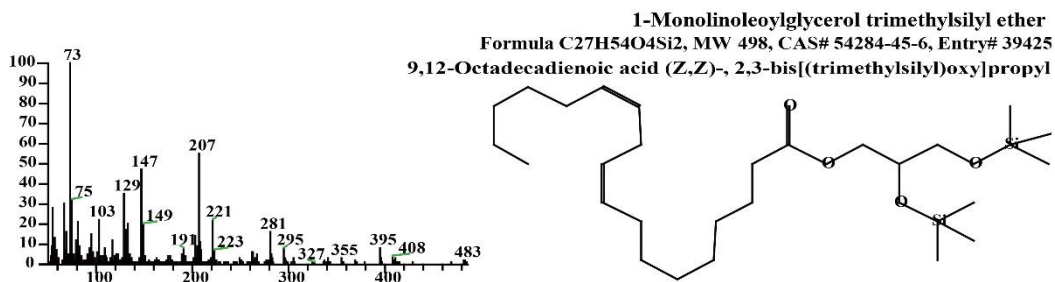

**Figure S9. Mass spectrometry analysis of a component at retention times of 15.32 min, 15.69 min, 15.94 min, 17.58 min identified as 1-Monolinoleoylglycerol trimethylsilyl ether.**

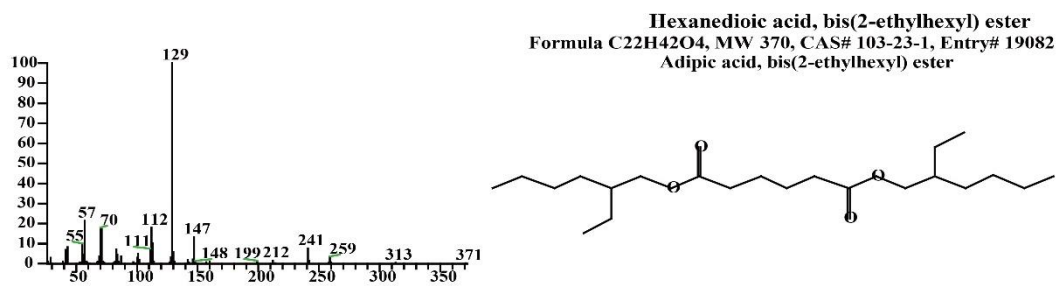

**Figure S10. Mass spectrometry analysis of a component at the retention time of 16.70 min identified as Hexanedioic acid, bis(2-ethylhexyl) ester.**

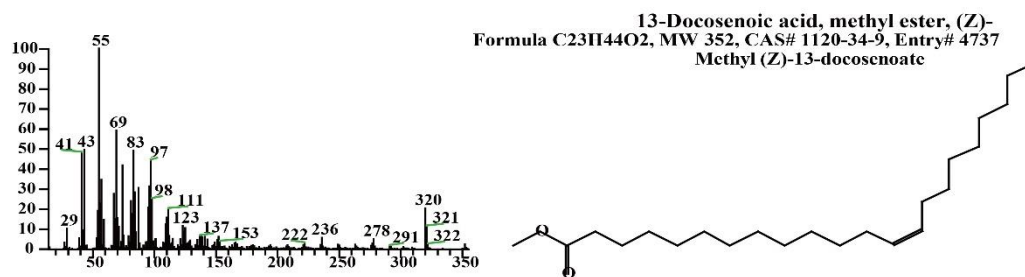

**Figure S11. Mass spectrometry analysis of a component at retention time of 17.16 min identified as 13-Docosenoic acid, methyl ester, (Z)-.**

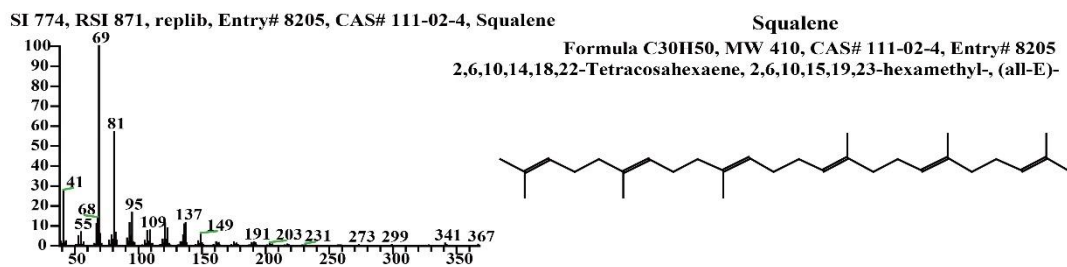

**Figure S12. Mass spectrometry analysis of a component at the retention time of 18.98 min identified as Squalene.**

SI 935, RSI 937, replib, Entry# 7805, CAS# 288-13-1, 1H-Pyrazole

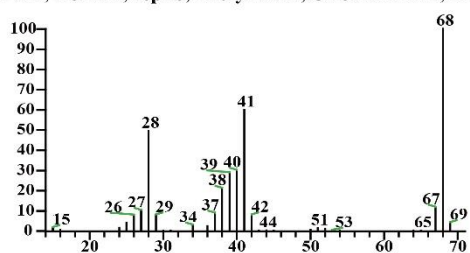

1H-Pyrazole  
Formula C3H4N2, MW 68, CAS# 288-13-1, Entry# 7805  
Pyrazole

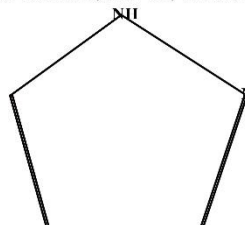

**Figure S13. Mass spectrometry analysis of a component at the retention time of 5.85 min identified as 1H-Pyrazole.**

SI 828, RSI 838, mainlib, Entry# 947, CAS# 929-06-6, Diglycolamine

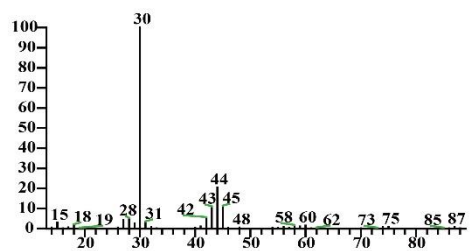

**Diglycolamine**  
Formula C<sub>4</sub>H<sub>11</sub>NO<sub>2</sub>, MW 105, CAS# 929-06-6, Entry# 947  
Ethanol, 2-(2-aminoethoxy)-

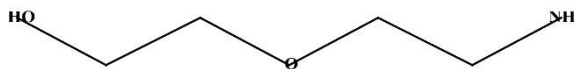

**Figure S14. Mass spectrometry analysis of a component at the retention time of 7.75 min identified as Diglycolamine.**

SI 788, RSI 830, mainlib, Entry# 25463, CAS# 4747-21-1, 2-Propanamine, N-methyl-

2-Propanamine, N-methyl-  
Formula C<sub>4</sub>H<sub>11</sub>N, MW 73, CAS# 4747-21-1, Entry# 25463  
Ethylamine, N,1-dimethyl-

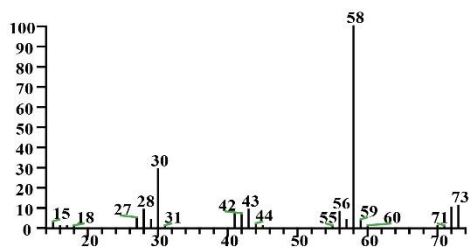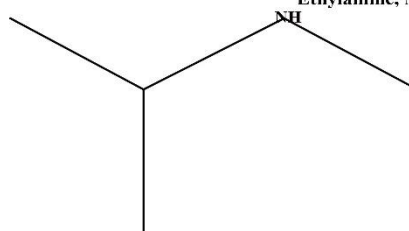

**Figure S15. Mass spectrometry analysis of a component at the retention time of 8.92 min identified as 2-Propanamine, N-methyl-.**



SI 879, RSI 881, replib, Entry# 14200, CAS# 622-40-2, 4-Morpholineethanol

4-Morpholineethanol  
Formula C<sub>6</sub>H<sub>13</sub>NO<sub>2</sub>, MW 131, CAS# 622-40-2, Entry# 14200  
Morpholinoethanol

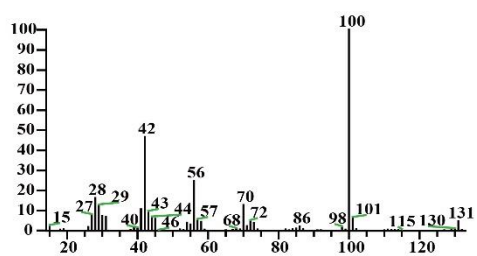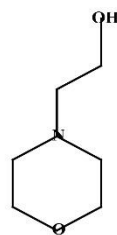

**Figure S16. Mass spectrometry analysis of a component at the retention time of 9.12 min identified as 4-Morpholineethanol.**

SI 781, RSI 815, mainlib, Entry# 51844, CAS# 26896-20-8, Neodecanoic acid

Neodecanoic acid

Formula C<sub>10</sub>H<sub>20</sub>O<sub>2</sub>, MW 172, CAS# 26896-20-8, Entry# 51844

Wiltz-65

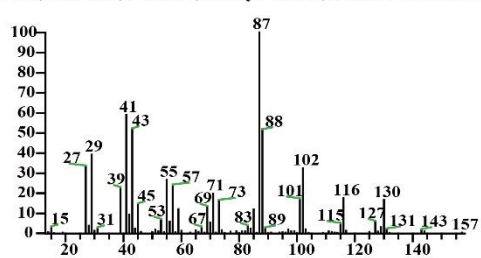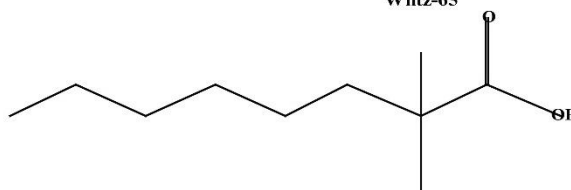

**Figure S17. Mass spectrometry analysis of a component at the retention time of 10.47 min identified as Neodecanoic acid.**

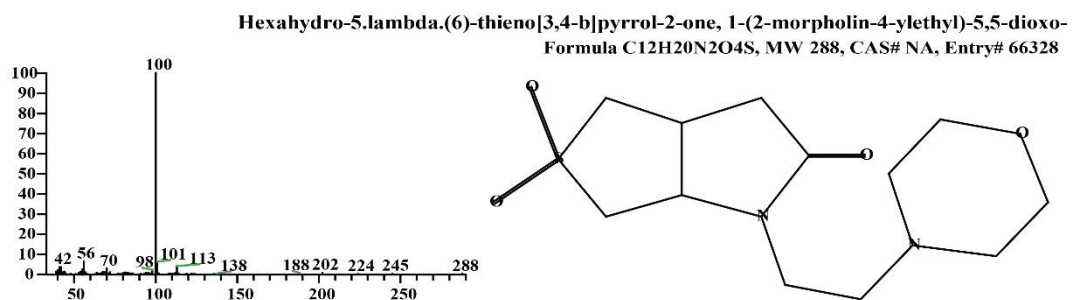

**Figure S18. Mass spectrometry analysis of a component at the retention time of 11.46 min identified as Hexahydro-5.lambda.(6)-thieno[3,4-b]pyrrol-2-one, 1-(2-morpholin-4-ylethyl)-5,5-dioxo-.**

SI 683, RSI 739, replib, Entry# 14195, CAS# 123-00-2, 4-Morpholinepropanamine

4-Morpholinepropanamine  
Formula C7H16N2O, MW 144, CAS# 123-00-2, Entry# 14195  
Morpholine, 4-(3-aminopropyl)-

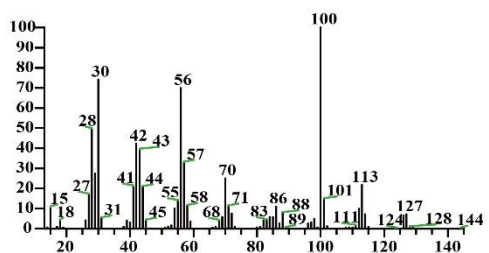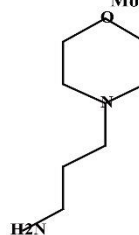

**Figure S19. Mass spectrometry analysis of a component at the retention time of 12.18 min identified as 4-Morpholinepropanamine.**

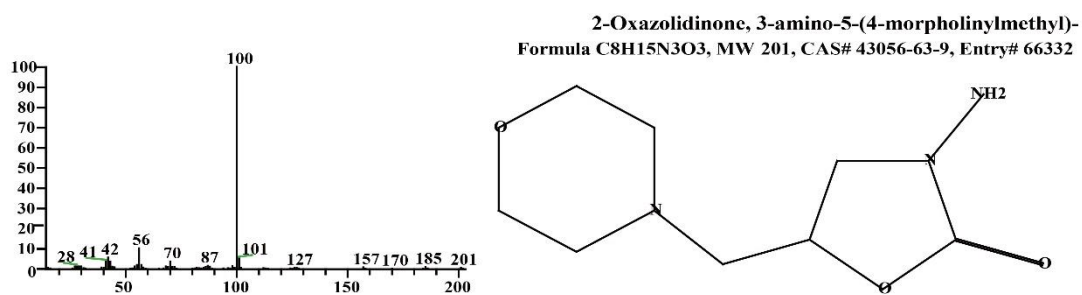

**Figure S20. Mass spectrometry analysis of a component at the retention time of 12.50 min identified as 2-Oxazolidinone, 3-amino-5-(4-morpholinylmethyl)-.**

SI 679, RSI 719, replib, Entry# 7652, CAS# 544-35-4, Linoleic acid ethyl ester

Linoleic acid ethyl ester

Formula C<sub>20</sub>H<sub>36</sub>O<sub>2</sub>, MW 308, CAS# 544-35-4, Entry# 7652  
Ethyl linoleate

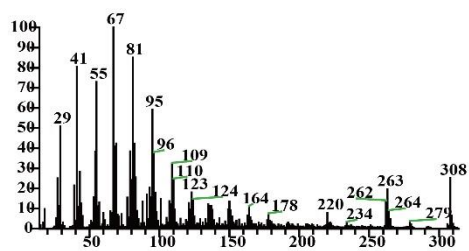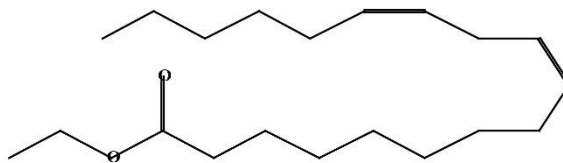

**Figure S21. Mass spectrometry analysis of a component at the retention time of 15.56 min identified as Linoleic acid ethyl ester.**

SI 855, RSI 901, replib, Entry# 7681, CAS# 60-33-3, 9,12-Octadecadienoic acid (Z,Z)- **9,12-Octadecadienoic acid (Z,Z)-**  
Formula C18H32O2, MW 280, CAS# 60-33-3, Entry# 7681  
cis-9,cis-12-Octadecadienoic acid

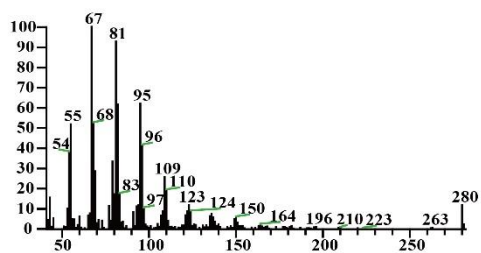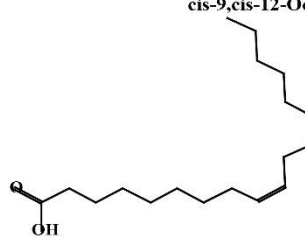

**Figure S22. Mass spectrometry analysis of a component at the retention time of 15.74 min identified as 9,12-Octadecadienoic acid (Z,Z)-.**

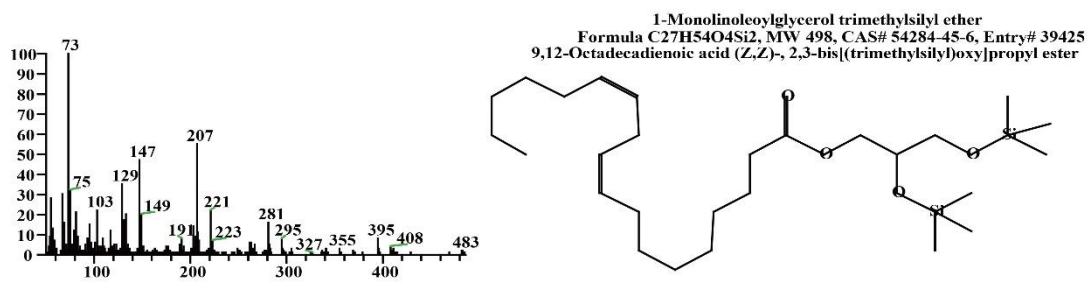

**Figure S23. Mass spectrometry analysis of a component at the retention time of 15.86 min identified as 1-Monolinoleoylglycerol trimethylsilyl ether.**



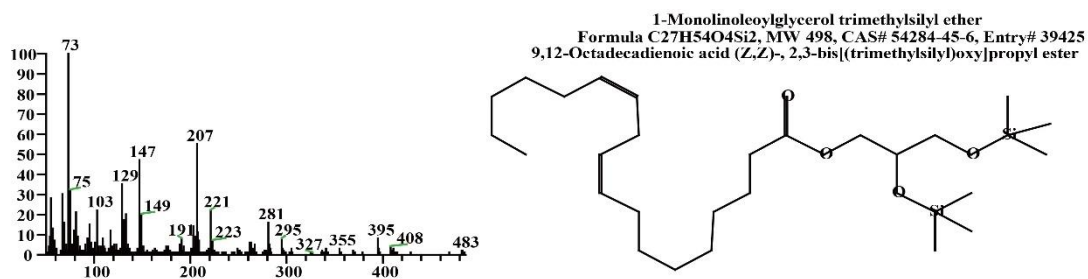

**Figure S24. Mass spectrometry analysis of a component at the retention time of 15.94 min identified as 1,8-Dioxa-5-thiaoctane, 8-(9-borabicyclo[3.3.1]non-9-yl)-3-(9-borabicyclo[3.3.1]non-9-yloxy)-1-phenyl-.**

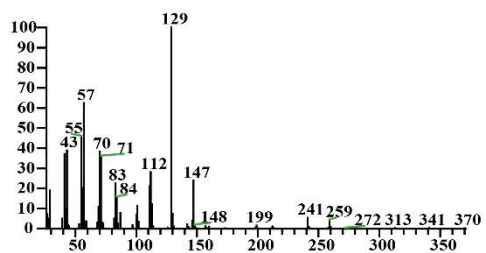

**Hexanedioic acid, bis(2-ethylhexyl) ester**  
Formula C<sub>22</sub>H<sub>42</sub>O<sub>4</sub>, MW 370, CAS# 103-23-1, Entry# 19079  
Adipic acid, bis(2-ethylhexyl) ester

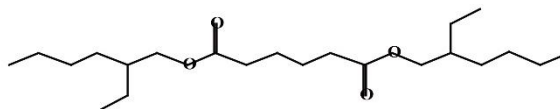

**Figure S25. Mass spectrometry analysis of a component at the retention time of 16.69 min identified as Hexanedioic acid, bis(2-ethylhexyl) ester.**

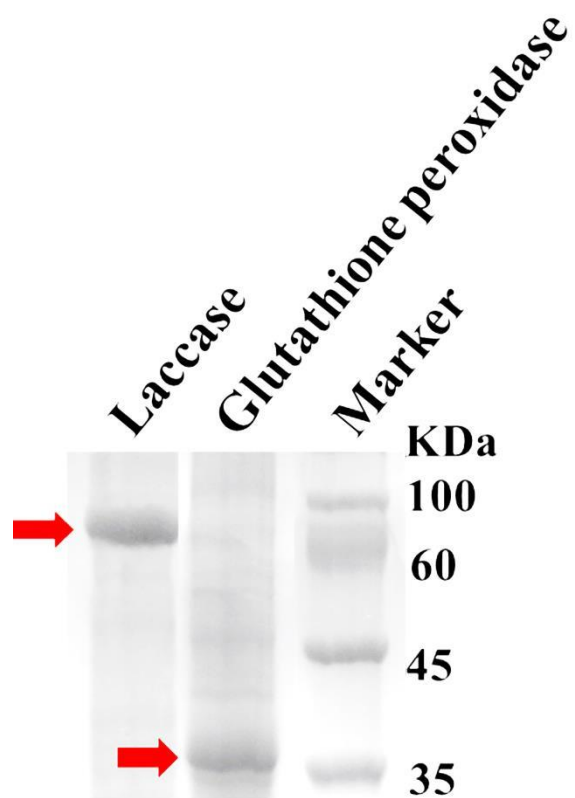

**Figure S26. Coomassie blue-stained SDS gel of purified His-tagged Glutathione peroxidase and Laccase.**

**Supplementary Table S1. Mass spectrometric identification of compositions released from the PE film treated by *Alternaria* sp. FB1 for 60 days.**

| Retention time | Peak Area   | Area % | chemical formula                                               | Compound Name                                | Cas #      |
|----------------|-------------|--------|----------------------------------------------------------------|----------------------------------------------|------------|
| 11.70          | 3803383.72  | 2.33   | C <sub>12</sub> H <sub>23</sub> N                              | Cyclohexanamine, N-cyclohexyl-               | 101-83-7   |
| 12.01          | 5640482.26  | 3.45   | C <sub>14</sub> H <sub>42</sub> O <sub>7</sub> Si <sub>7</sub> | Cycloheptasiloxane, tetradecamethyl-         | 107-50-6   |
| 13.01          | 7789352.35  | 4.77   | C <sub>12</sub> H <sub>27</sub>                                | Tributyl phosphate                           | 126-73-8   |
| 15.32          | 8879994.65  | 5.44   | C <sub>27</sub> H <sub>54</sub> O <sub>4</sub> Si <sub>2</sub> | 1-Monolinoleoylglycerol trimethylsilyl ether | 54284-45-6 |
| 15.69          | 14727808.96 | 9.02   | C <sub>27</sub> H <sub>54</sub> O <sub>4</sub> Si <sub>2</sub> | 1-Monolinoleoylglycerol trimethylsilyl ether | 54284-45-6 |
| 15.94          | 7910509.73  | 4.84   | C <sub>27</sub> H <sub>54</sub> O <sub>4</sub> Si <sub>2</sub> | 1-Monolinoleoylglycerol trimethylsilyl ether | 54284-45-6 |
| 16.70          | 26809165.70 | 16.42  | C <sub>22</sub> H <sub>42</sub> O <sub>4</sub>                 | Hexanedioic acid, bis(2-ethylhexyl) ester    | 103-23-1   |
| 17.16          | 12894410.05 | 7.90   | C <sub>23</sub> H <sub>44</sub> O <sub>2</sub>                 | 13-Docosenoic acid, methyl ester, (Z)-       | 1120-34-9  |
| 17.58          | 52152219.34 | 31.94  | C <sub>27</sub> H <sub>54</sub> O <sub>4</sub> Si <sub>2</sub> | 1-Monolinoleoylglycerol trimethylsilyl ether | 54284-45-6 |
| 18.98          | 22675990.39 | 13.89  | C <sub>30</sub> H <sub>50</sub>                                | Squalene                                     | 111-02-4   |

**Supplementary Table S2. Mass spectrometric identification of compositions released from the PE film treated by *Alternaria* sp. FB1 for 120 days.**

| Retention time | Peak Area     | Area % | chemical formula                                                | Compound Name                                                                          | Cas #      |
|----------------|---------------|--------|-----------------------------------------------------------------|----------------------------------------------------------------------------------------|------------|
| 5.85           | 160827301.91  | 1.98   | C <sub>3</sub> H <sub>4</sub> N <sub>2</sub>                    | 1H-Pyrazole                                                                            | 288-13-1   |
| 7.75           | 7586192268.64 | 93.28  | C <sub>4</sub> H <sub>11</sub> NO <sub>2</sub>                  | Diglycolamine                                                                          | 929-06-6   |
| 8.92           | 53491610.03   | 0.66   | C <sub>4</sub> H <sub>11</sub> N                                | 2-Propanamine, N-methyl-                                                               | 4747-21-1  |
| 9.12           | 8303541.90    | 0.10   | C <sub>6</sub> H <sub>13</sub> NO <sub>2</sub>                  | 4-Morpholineethanol                                                                    | 622-40-2   |
| 10.47          | 17177624.61   | 0.21   | C <sub>10</sub> H <sub>20</sub> O <sub>2</sub>                  | Neodecanoic acid                                                                       | 26896-20-8 |
| 11.46          | 40745877.94   | 0.50   | C <sub>12</sub> H <sub>20</sub> N <sub>2</sub> O <sub>4</sub> S | Hexahydro-5.lambda.(6)-thieno[3,4-b]pyrrol-2-one, 1-(2-morpholin-4-ylethyl)-5,5-dioxo- | NA         |
| 12.18          | 10690688.81   | 0.13   | C <sub>7</sub> H <sub>16</sub> N <sub>2</sub> O                 | 4-Morpholinepropanamine                                                                | 123-00-2   |
| 12.50          | 6114688.36    | 0.08   | C <sub>8</sub> H <sub>15</sub> N <sub>3</sub> O <sub>3</sub>    | 2-Oxazolidinone, 3-amino-5-(4-morpholinylmethyl)-                                      | 43056-63-9 |
| 15.56          | 23251808.47   | 0.29   | C <sub>20</sub> H <sub>36</sub> O <sub>2</sub>                  | Linoleic acid ethyl ester                                                              | 544-35-4   |
| 15.74          | 54484769.63   | 0.67   | C <sub>18</sub> H <sub>32</sub> O <sub>2</sub>                  | 9,12-Octadecadienoic acid (Z,Z)-                                                       | 60-33-3    |
| 15.86          | 9971750.86    | 0.12   | C <sub>27</sub> H <sub>54</sub> O <sub>4</sub> Si <sub>2</sub>  | 1-Monolinoleoylglycerol trimethylsilyl ether                                           | 54284-45-6 |
| 15.94          | 16603906.65   | 0.20   | C <sub>27</sub> H <sub>54</sub> O <sub>4</sub> Si <sub>2</sub>  | 1-Monolinoleoylglycerol trimethylsilyl ether                                           | 54284-45-6 |
| 16.69          | 15787407.31   | 0.19   | C <sub>22</sub> H <sub>42</sub> O <sub>4</sub>                  | Hexanedioic acid, bis(2-ethylhexyl) ester                                              | 103-23-1   |

**Supplementary Table S3. Primers used for construction of vectors for expression of potential PE-degrading enzymes.**

| <b>Primer</b>            | <b>Sequence</b>                 |
|--------------------------|---------------------------------|
| Glutathione peroxidase F | GGATCCATGATTTCGATTGGGAGGGG      |
| Glutathione peroxidase R | CTCGAGTTTGCCGCCAGCTCCTTC        |
| Laccase F                | GGATCCATGAGCGAGCACACTGATTCGC    |
| Laccase R                | CTCGAGGATTGTGTCCGTGTCTAGAATTCTT |
